# Supplementary material for: Amnion responses to intrauterine inflammation and effects of inhibition of TNF signaling in preterm Rhesus macaque
Source: PubMed Central journal article supplement — iScience. 2023 Oct 6;26(11):108118. doi: 10.1016/j.isci.2023.108118 (PMC10637919; doi:10.1016/j.isci.2023.108118), 2023-10-06
Supplement: mmc1.pdf [file mmc1.pdf]

**Supplemental information**

**Amnion responses to intrauterine inflammation  
and effects of inhibition of TNF signaling  
in preterm Rhesus macaque**

**Pietro Presicce, Monica Cappelletti, Marco Morselli, Feiyang Ma, Paranthaman Senthamaraikannan, Giulia Protti, Brian B. Nadel, Laila Aryan, Mansoureh Eghbali, Lukasz Salwinski, Neema Pithia, Emily De Franco, Lisa A. Miller, Matteo Pellegrini, Alan H. Jobe, Claire A. Chougnnet, and Suhas G. Kallapur**

**Figure S1.**

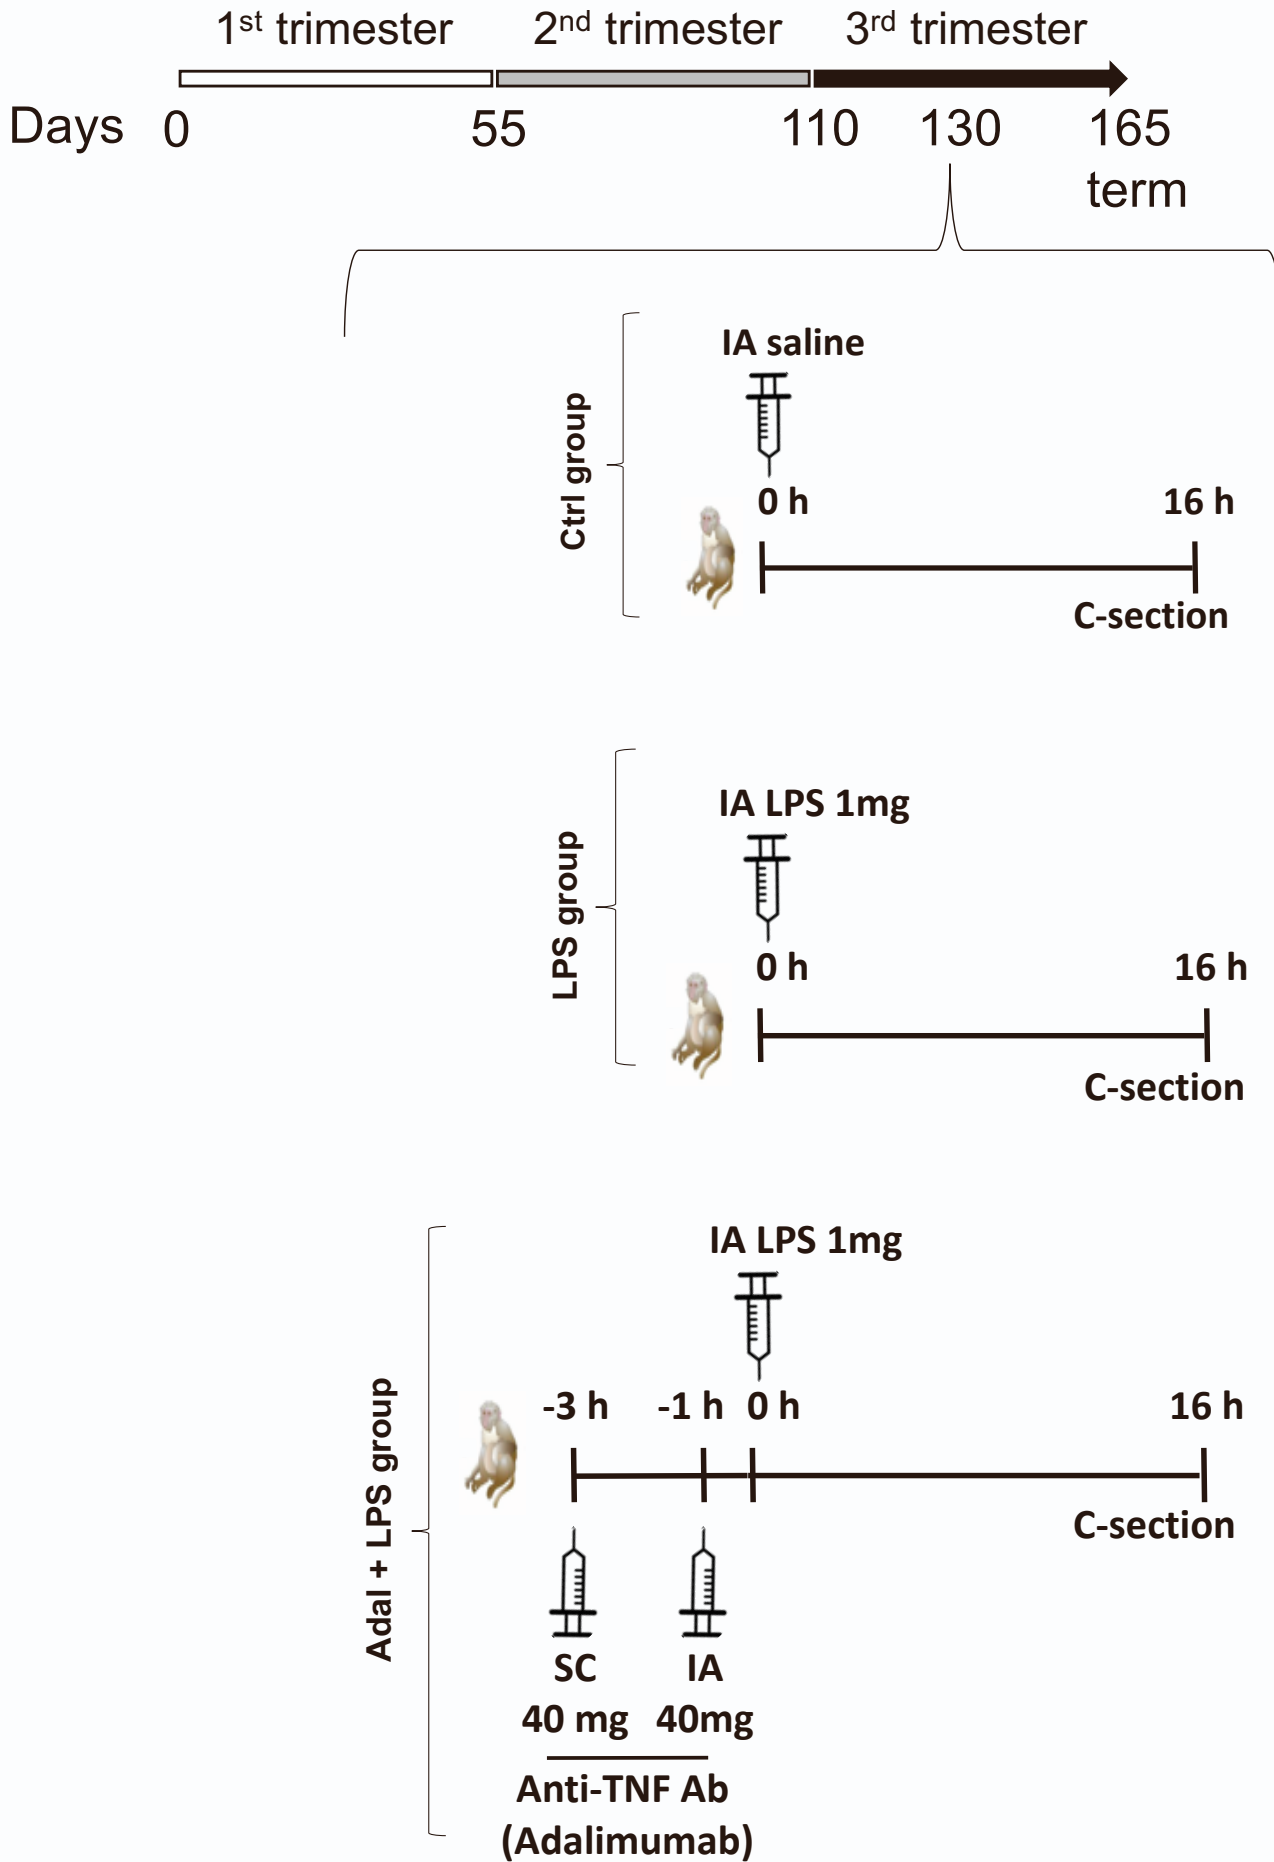

**Figure S1. [Experimental design], Related to Figures 1 and 2.** Scheme showing the experimental design in the three groups of animals: saline (Ctrl; n=12), LPS- (n=15) and Adalimumab (Adal) + LPS-exposed animals (n=6) (IA=intra-amniotic; SC=sub-cutaneous). One animal belonging to control group received saline by an intramuscular injection.

## Figure S2.

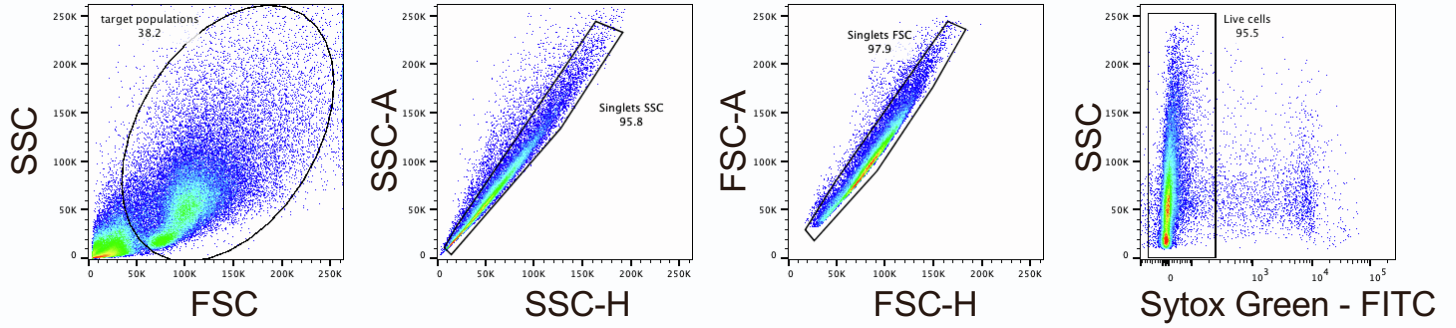

**Figure S2. [Flow cytometry gating strategy], Related to Figure 4.** Representative gating strategy (n=8) used to isolate live Rhesus chorioamnion-decidua (CAD) cells used for scRNA-seq. Debris were first excluded by SSC and FSC. Doublets were excluded by SSC-H and FSC-H and live cells were finally sorted as Sytox green- cells.

**Figure S3.**

**A.**

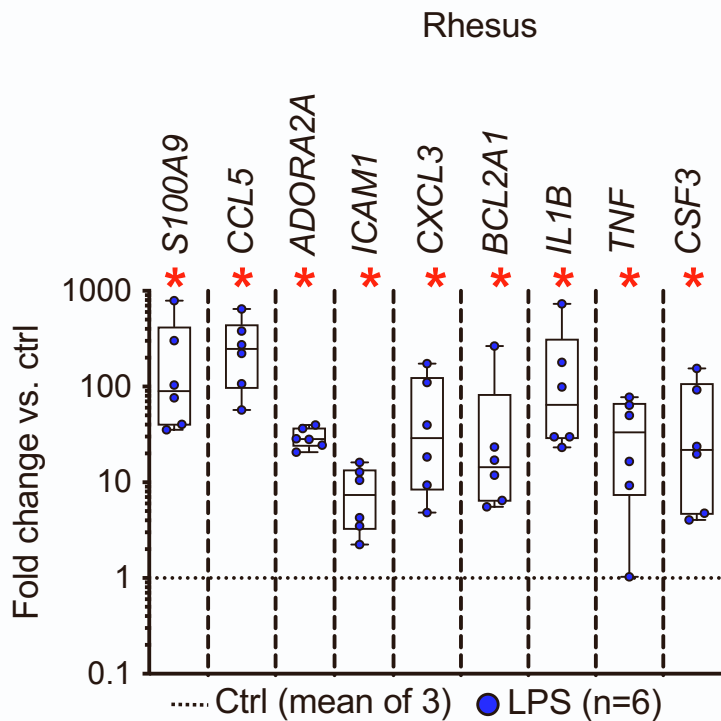

**B.**

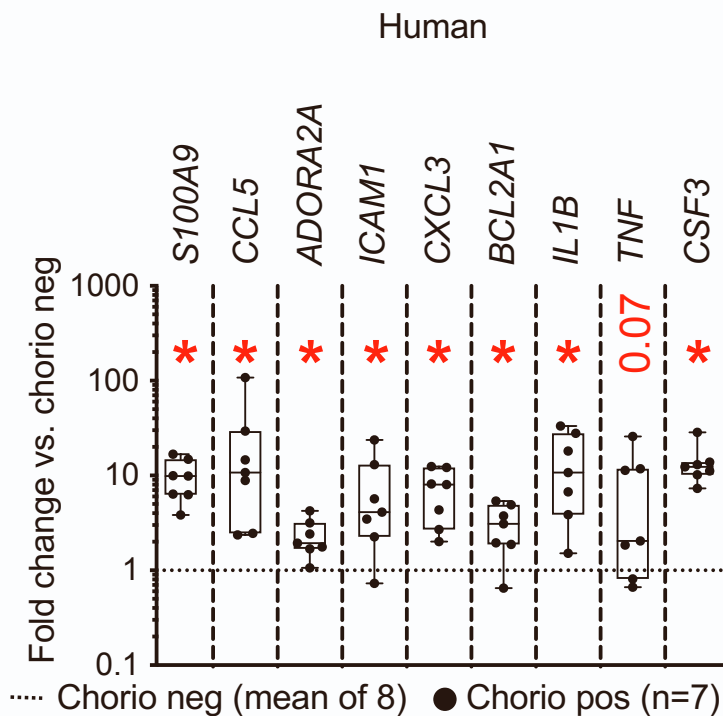

Validation of selected transcriptomic data by qPCR

**C.**

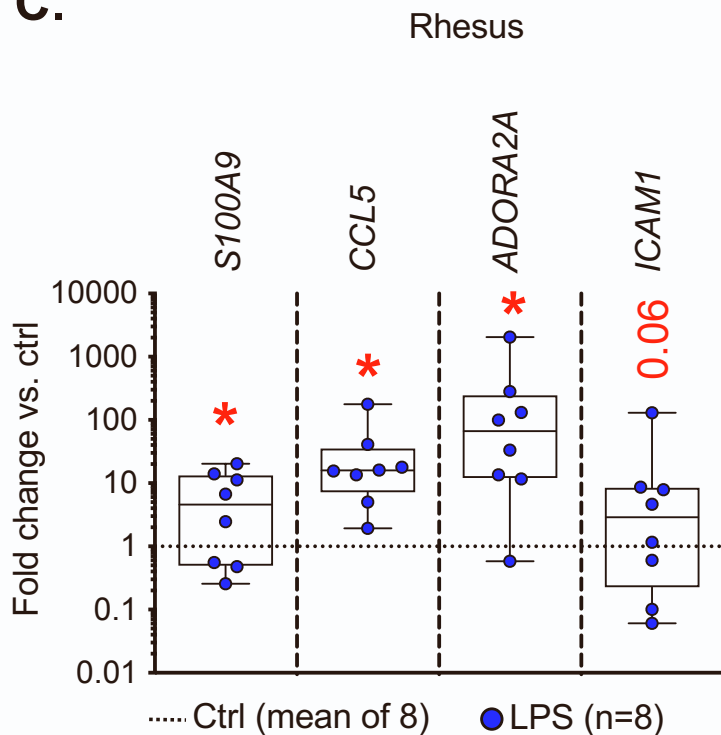

**D.**

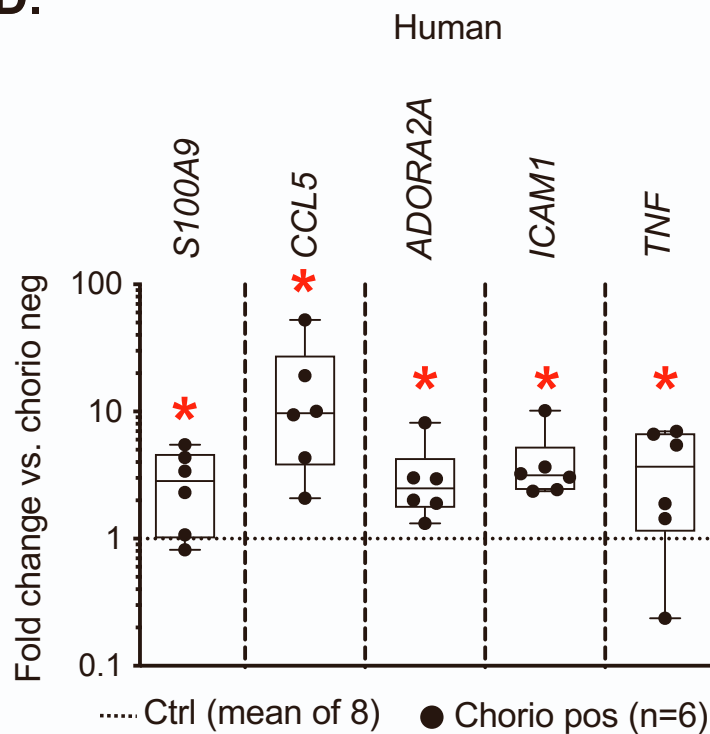

**Figure S3. [GO terms associated with inflammation], Related to Figure 2.** Bulk RNA-seq expression level of representative genes associated with the biological processes induced by LPS in (A) Rhesus and induced by chorioamnionitis in (B) human is shown as fold change relative to the average value of Ctrl or chorio neg (dashed line). Validation of selected transcript expression by qPCR analysis in (C) Rhesus and (D) human. The values were first internally normalized to the endogenous 18S RNA, and the box plot show fold-change of gene expression normalized to Ctrl in Rhesus or chorio neg in human. Data are represented as mean $\pm$ SE. P \* <0.05 vs. Ctrl in Rhesus or chorio neg in human (Mann–Whitney U test).

# Figure S4.

## A.

Chorio- and LPS- and downregulated genes

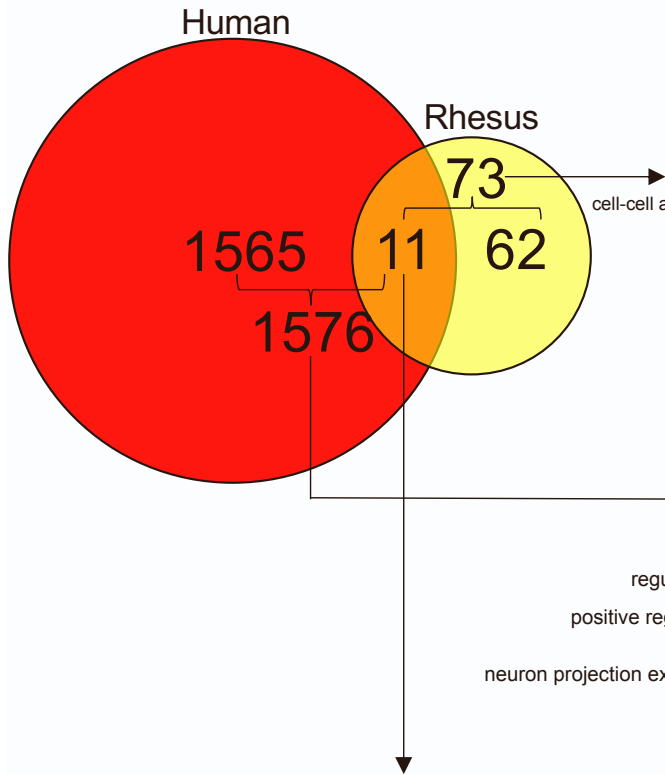

## B.

Top 10 downregulated GO Terms

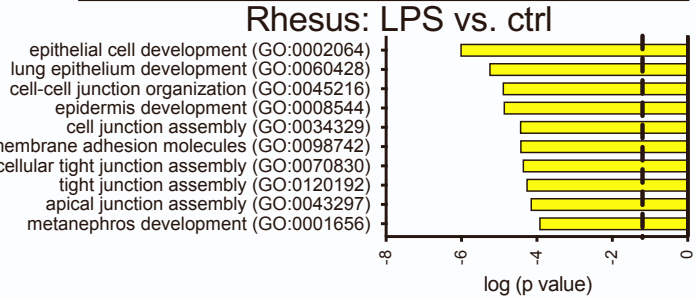

## C.

Top 10 downregulated GO Terms

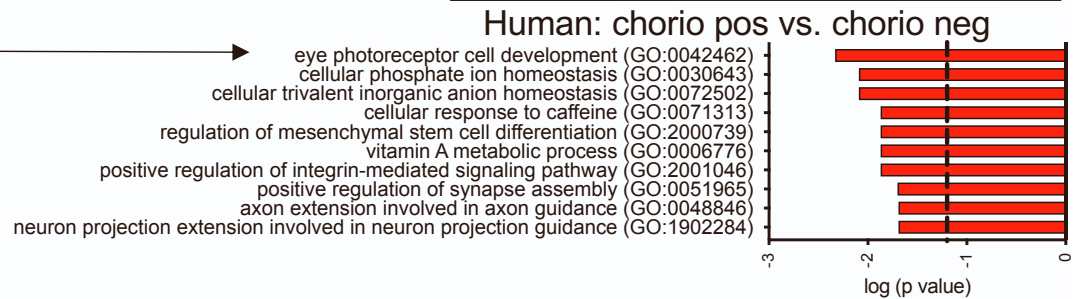

## D.

Top 12 shared downregulated GO Terms

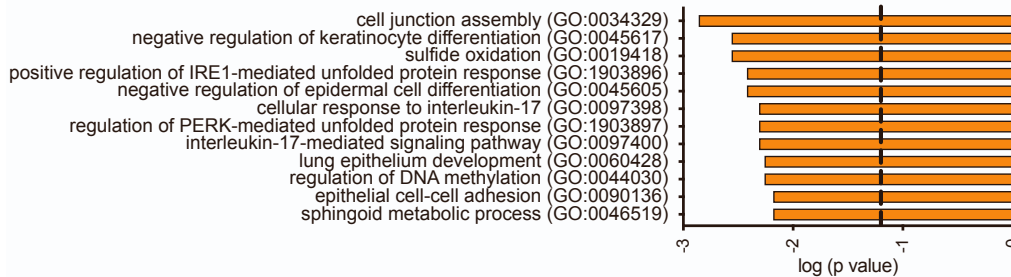

**Figure S4. [Downregulated genes upon inflammation in both Rhesus and human], Related to Figure 1.** (A) Venn diagrams displaying the genes that were significantly downregulated by chorioamnionitis in human and LPS-exposure in Rhesus (DEGs > 2-fold change; FDR adj p-value<0.05). (B-C) Top 10 GO terms of 73 downregulated genes in Rhesus upon LPS-exposure and of 1576 downregulated human genes upon chorioamnionitis, respectively. (D) Top 12 common downregulated GO terms of the 11 common genes downregulated by inflammation in both Rhesus and human.

# Figure S5.

## Top 12 GO Terms based on 125 upregulated genes by Adal+LPS vs. LPS

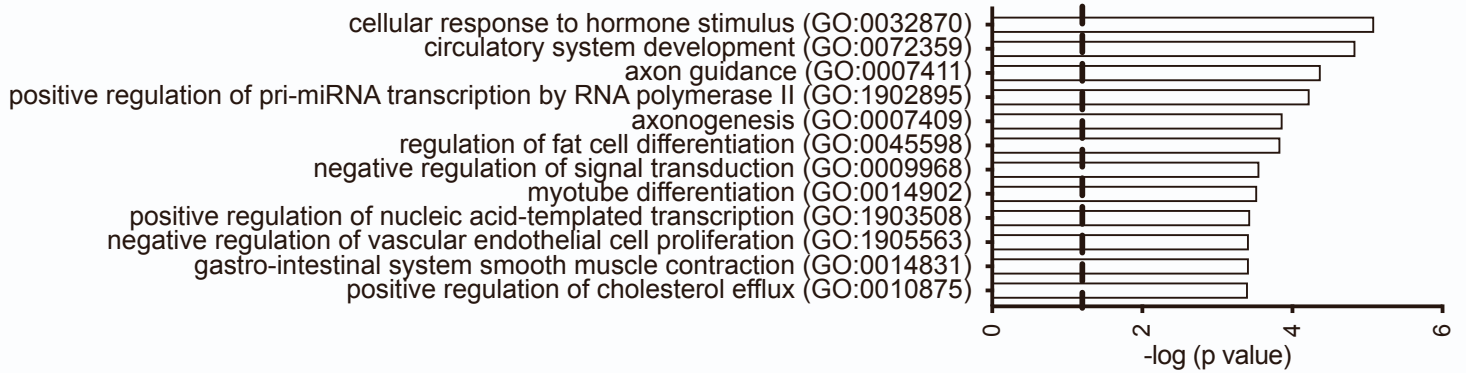

**Figure S5. [Upregulated GO terms induced by Adalimumab], Related to Figure 2.** Top 12 GO terms of 125 upregulated genes (DEGs > 2-fold change; and FDR adjusted p-value<0.05).



# Figure S6.

## Validation of selected genes by qPCR

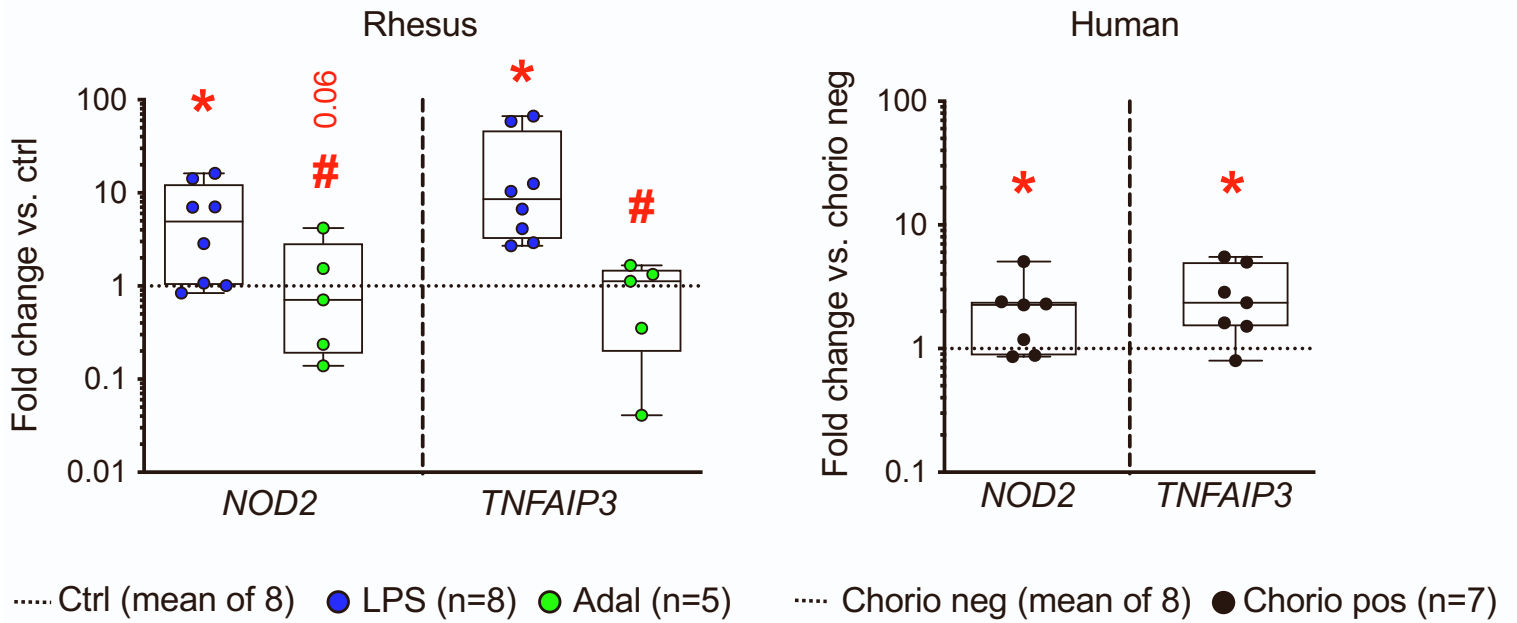

**Figure S6. [RNA-seq analysis validation], Related to Figure 3.** Validation of selected transcript expression by qPCR analysis in Rhesus and human amnion. qPCR was performed using Rhesus- and human-specific Taqman probes. The values were first internally normalized to the endogenous 18S RNA, and the box plot show fold-change of gene expression normalized to Ctrl in Rhesus or chorio neg in human. Data are represented as mean $\pm$ SE. P \* <0.05 vs. Ctrl in Rhesus or chorio neg in human (Mann–Whitney U test).

Figure S7.

Rhesus: LPS vs. Ctrl

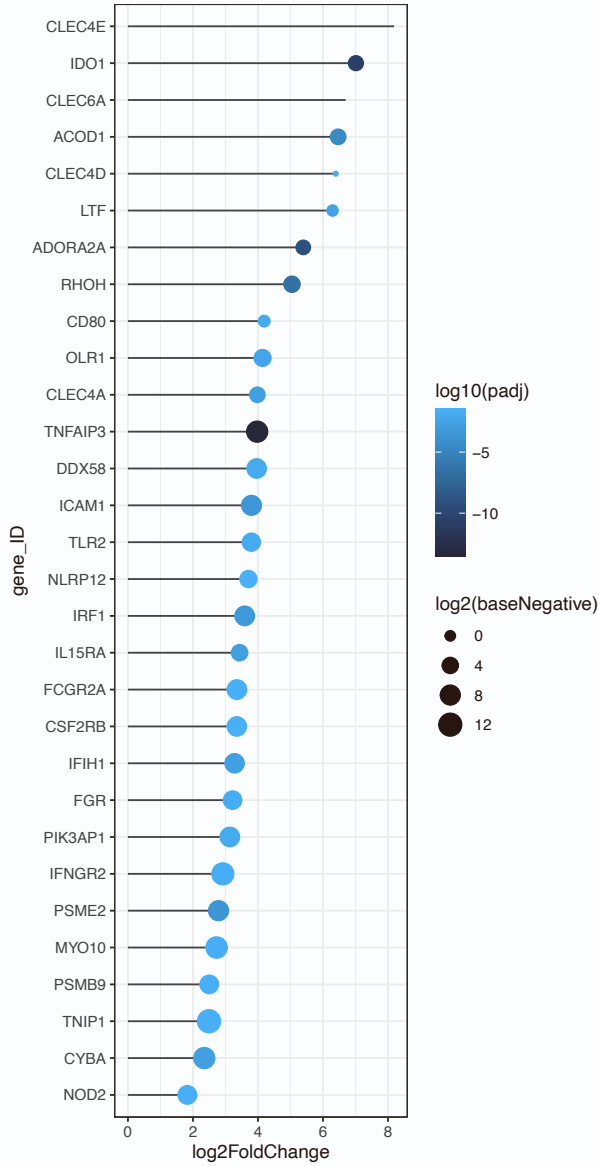

Human: chorio pos vs. chorio neg

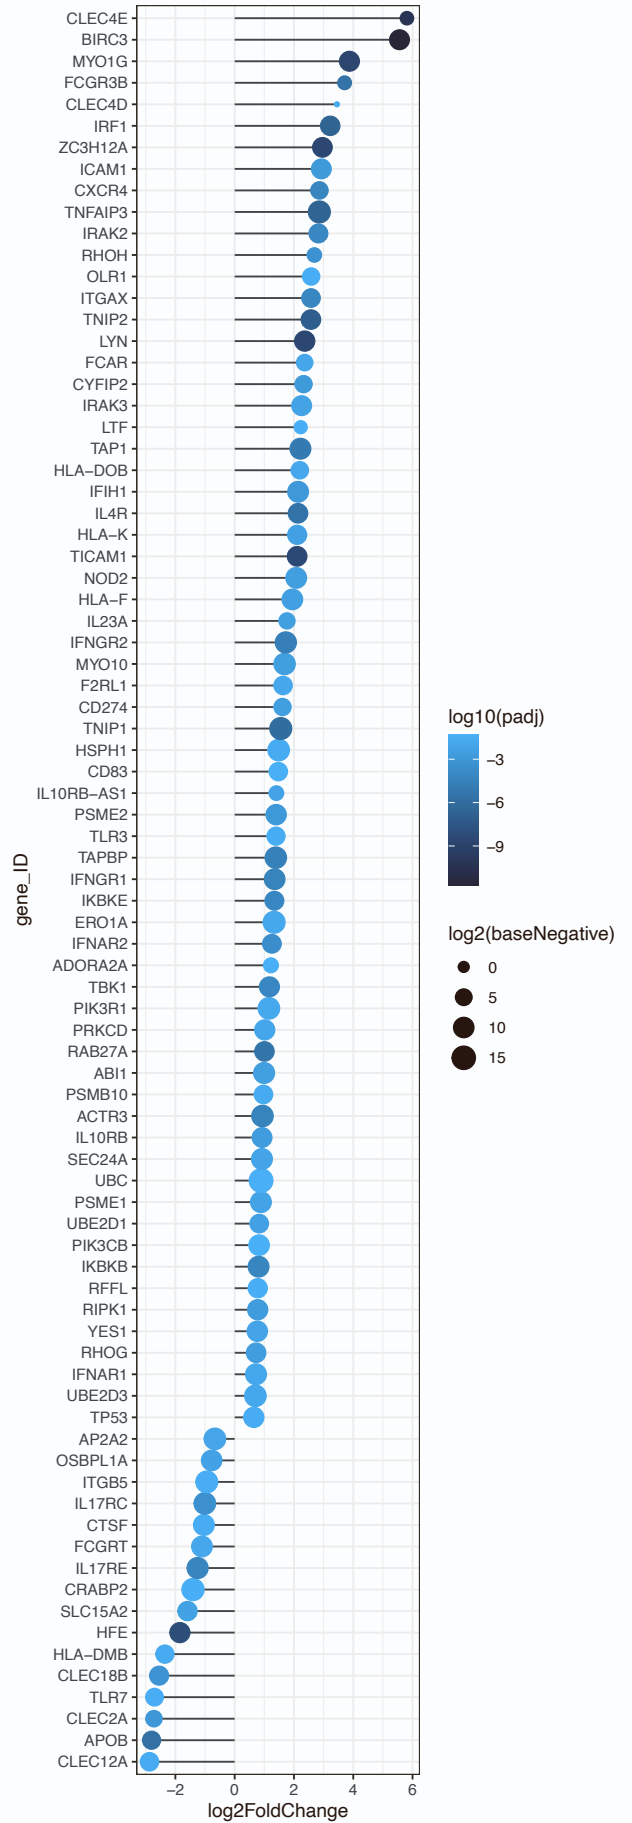

**Figure S7. [Expression of innate immune genes in the amnion exposed to inflammation], Related to Figure 6.** Lollipop chart from bulk RNA-seq data showing fold change and significance of several innate immune genes both in the Rhesus exposed to LPS vs. Ctrl and human chorio pos vs. chorio neg. Color intensity corresponds to log adjusted p-value and the size of the dot corresponds to log 2-fold increase relative to no inflammation group. The gene markers were curated from the corresponding GO terms 2001188, 0019884, 0019883, 0019882, 0002504, 0019885, 001986, 0042590, and 0002491.

# Figure S8.

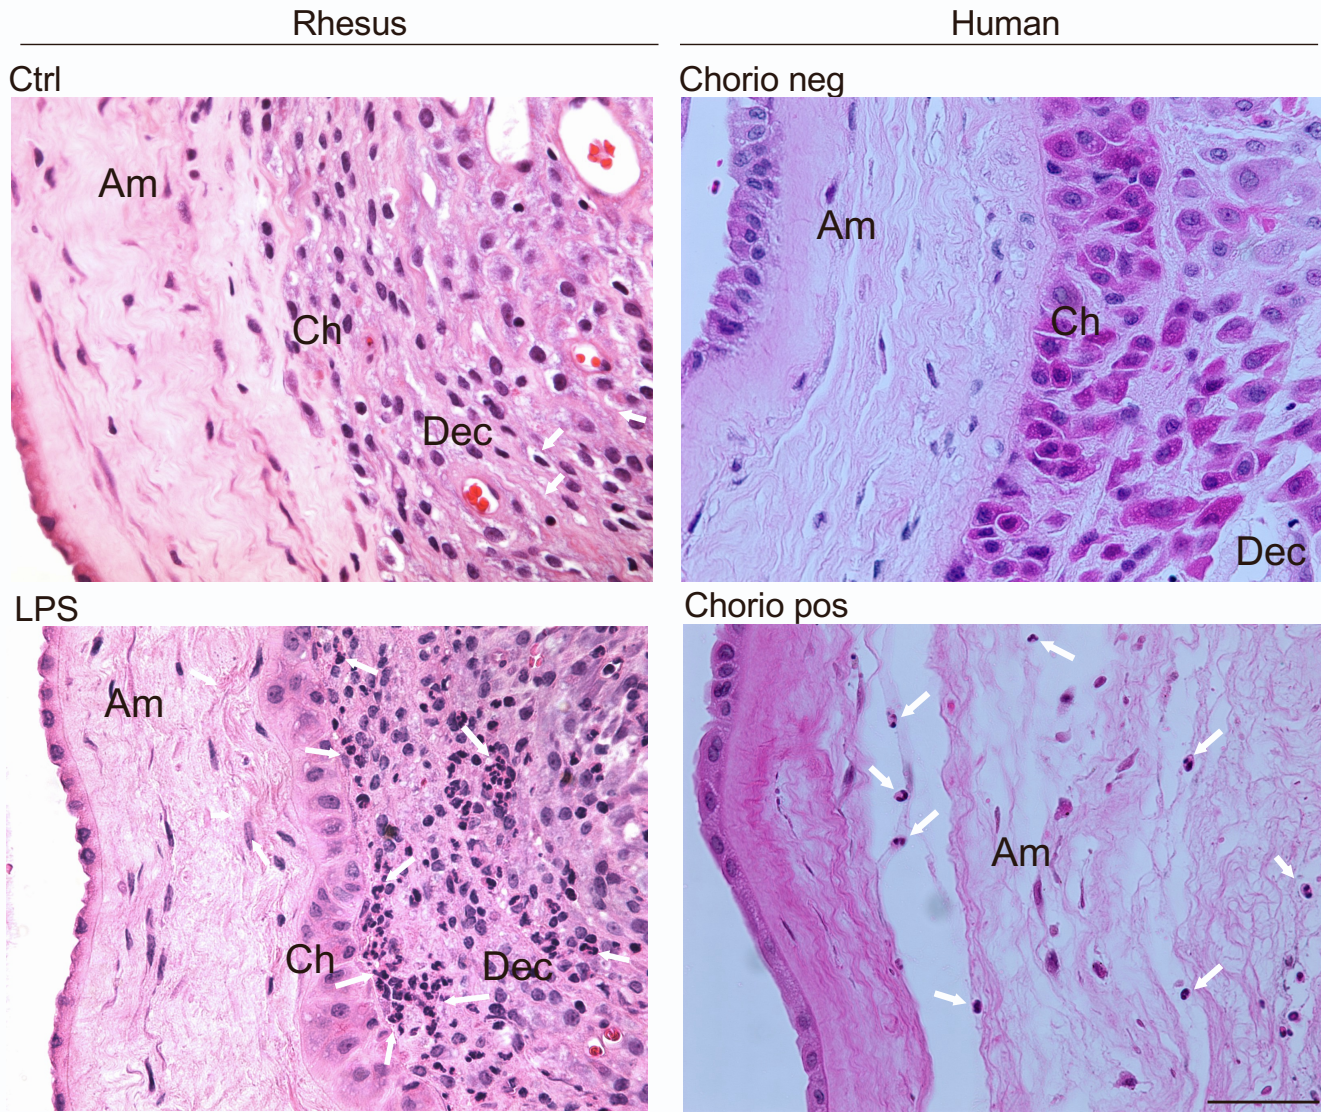

**Figure S8. [Immune cell infiltration in fetal membranes exposed to chorioamnionitis], Related to Figures 1 and 2.** Representative pictures of fixed membranes paraffin embedded showing Amnion (Am), Chorion (Ch), and Decidua parietalis (Dec). White arrows show neutrophil infiltration. Note that the neutrophil infiltration is restricted to chorio-decidual interface in LPS-exposed Rhesus macaques, while it is present in the amnion of 5 out of 7 human chorioamnionitis samples. No neutrophils were seen in Ctrl Rhesus or chorio neg human membranes. Bar = 50  $\mu$ m

# Figure S9.

## CAD scRNA-seq

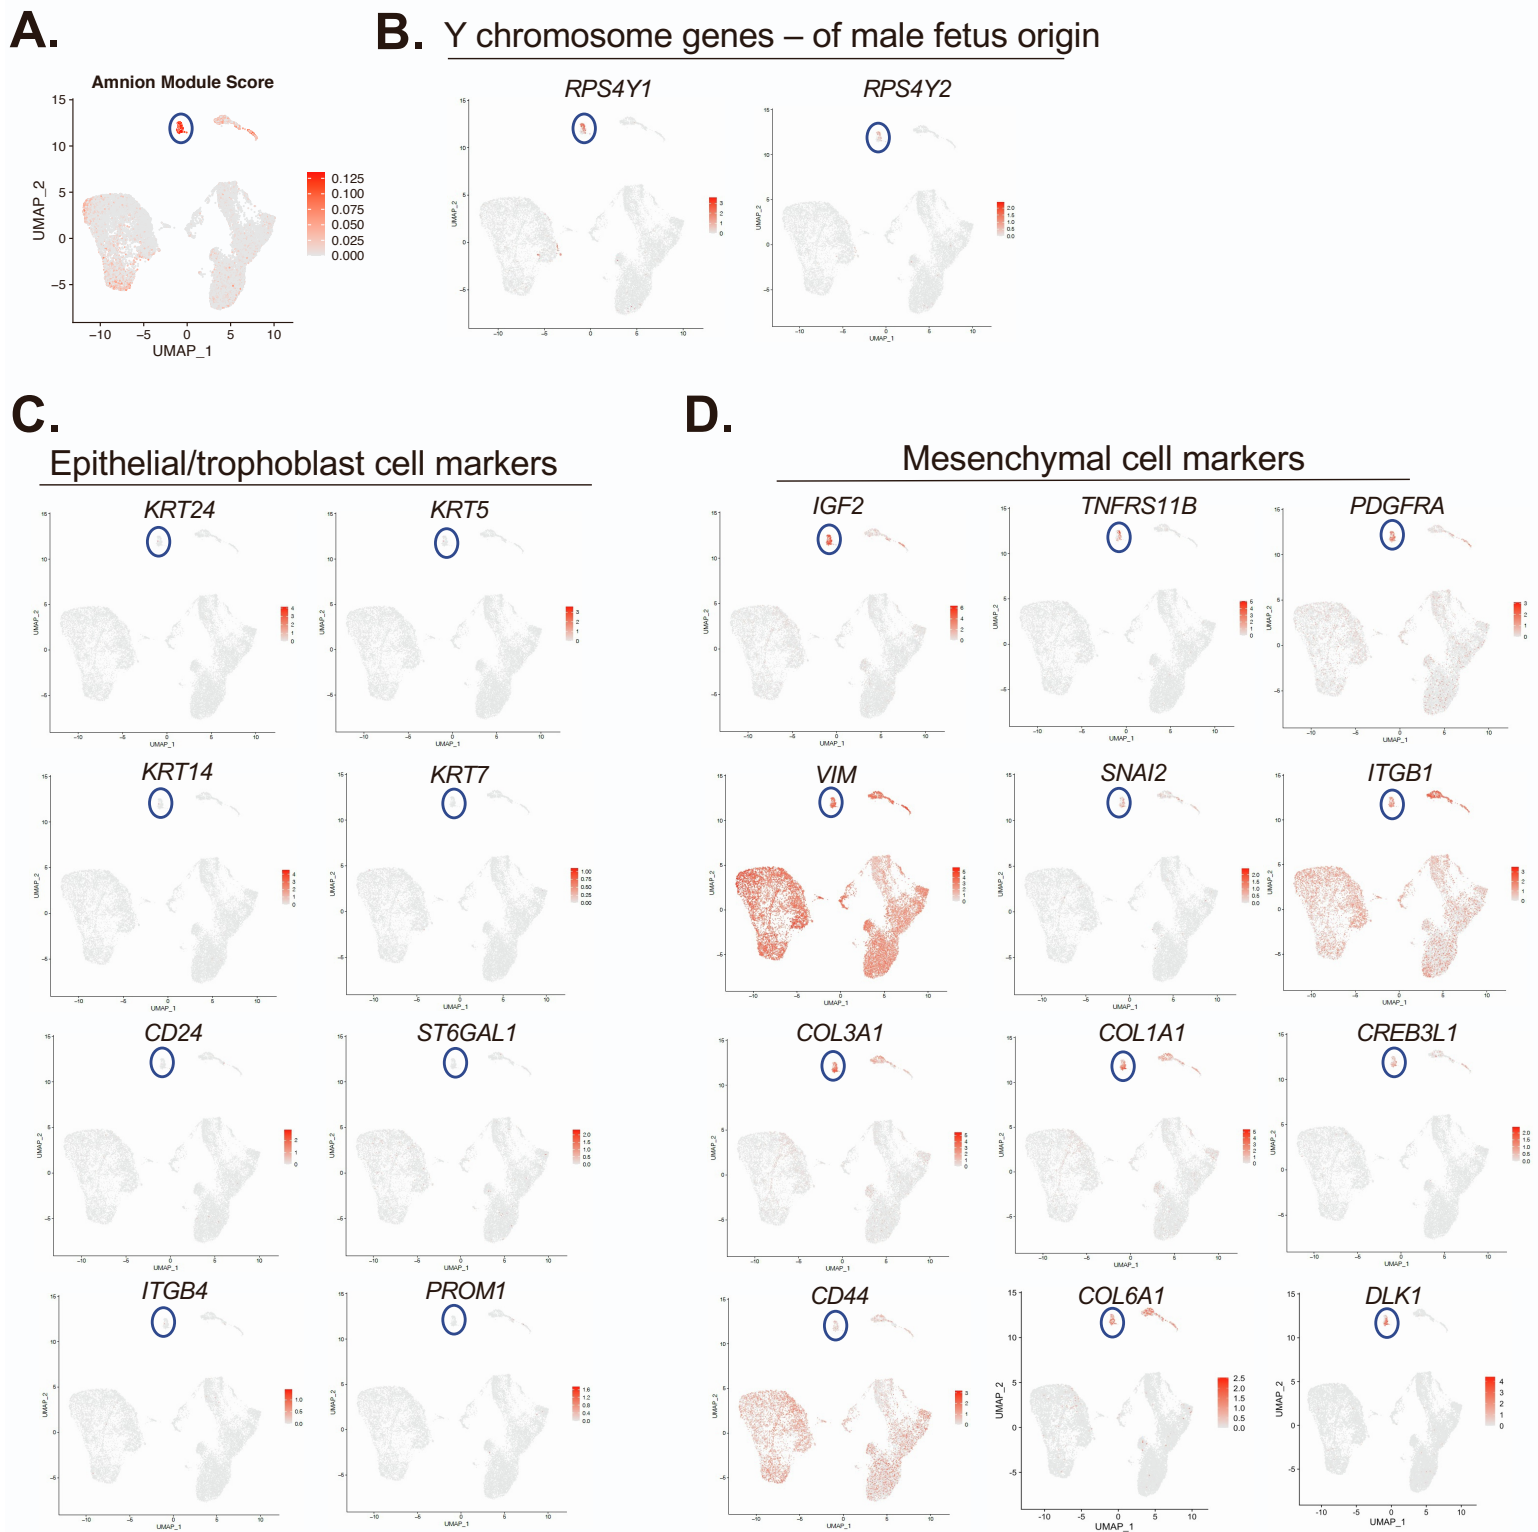

**Figure S9. [Annotation of amnion mesenchymal amnion cells (AMC) in the scRNA-seq of chorioamnion-decidua (CAD)], Related to Figure 4.** UMAP projection of the CAD cells is shown as in Figure 4A. (A) Top 100 genes expressed in the bulk RNA-seq of dissected human amnion with the highest proportional median from Kim et al., 2012. (B) Male fetal expression of Y chromosome genes *RPS4Y1* and *RPS4Y2* were limited to the AMCs and a few other choriodecidual cells. (C) Epithelial/trophoblast cell markers were not expressed in the AMCs. (D) Mesenchymal cell markers were predominantly expressed in the AMCs. (Ctrl n=1; LPS n=3; Adal+LPS n=3). The AMC cluster is outlined by a blue oval.

# Figure S10.

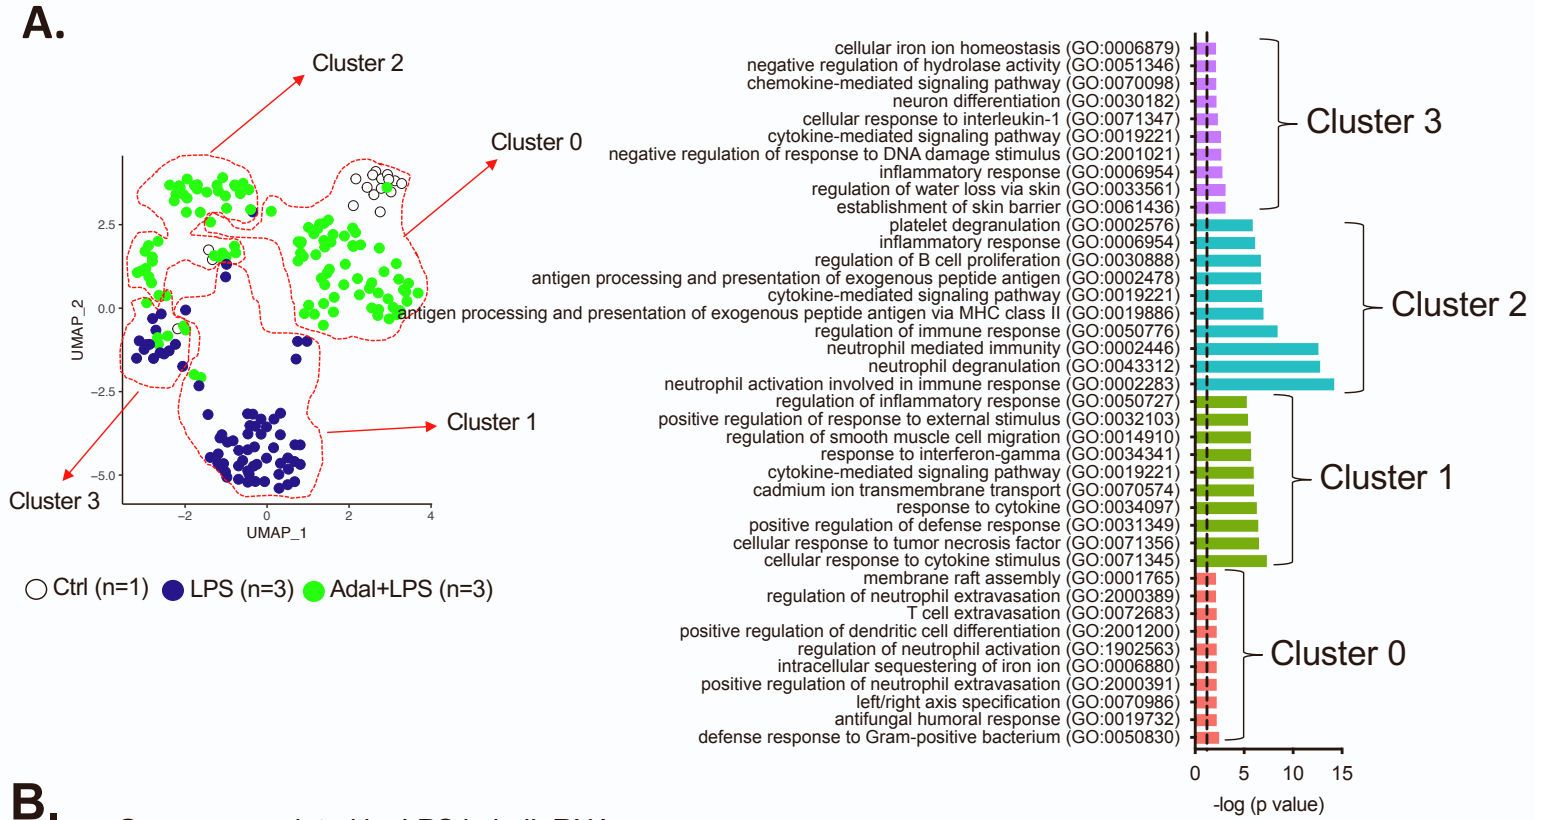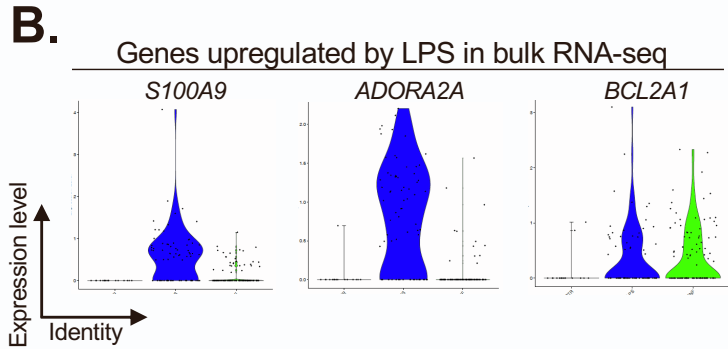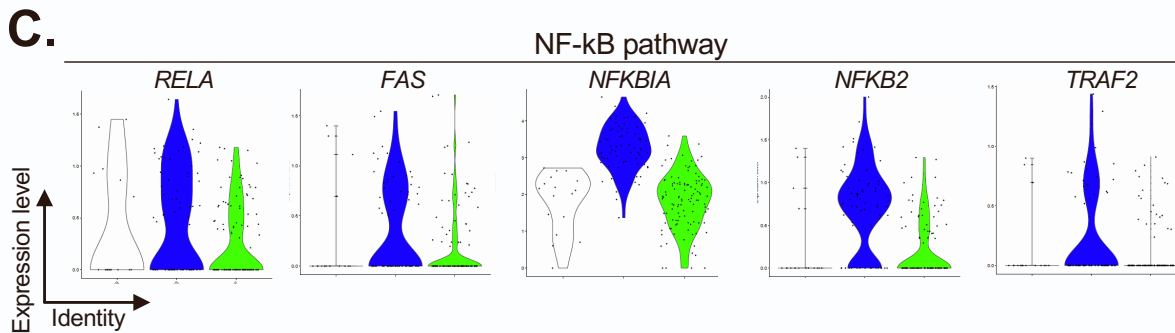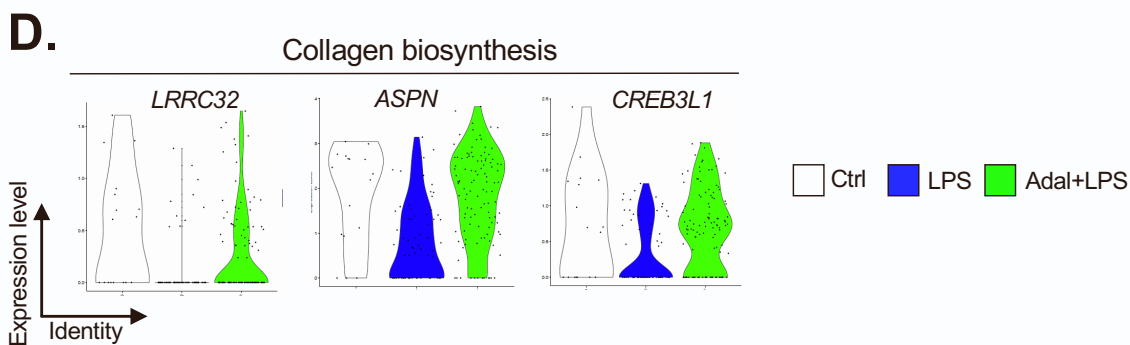

**Figure S10. [Similarities between GO terms and genes associated with AMC clusters and bulk RNA-seq analysis], Related to Figure 4.** (A) UMAP plot of AMCs based on exposure as in Figure 4C is shown to facilitate visualization of the 4 clusters and their associated GO terms. (B-D) Violin plots for the key selected genes in different exposure groups of scRNA-seq AMC clusters were generated based on their differential regulation in the amnion bulk RNA-seq data.

# Figure S11.

A.

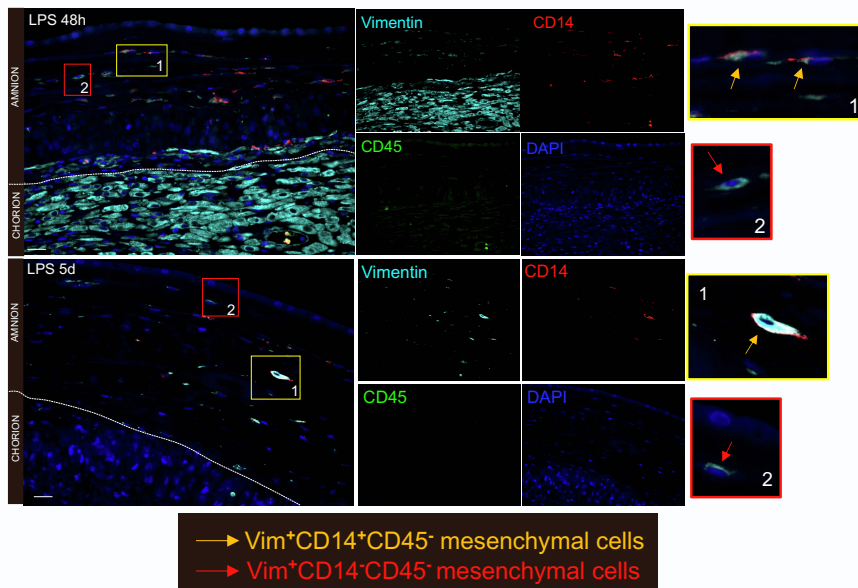

B.

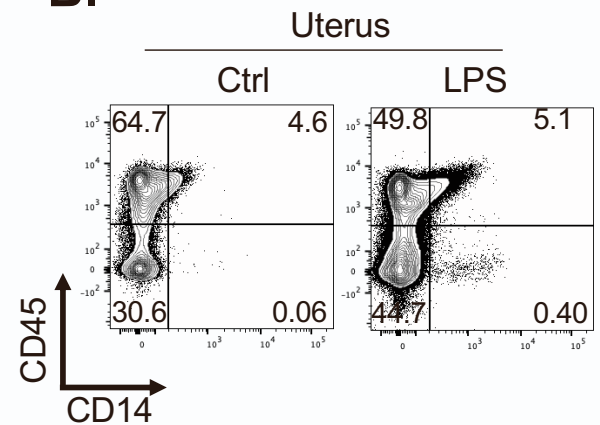

**Figure S11. [Amnion  $Vim^+CD14^-CD45^-$  cells persist 2d and 5d after LPS-exposure and low frequency of uterine  $CD14^+CD45^-$  cells], Related to Figure 5.** (A) Animals were delivered after a prolonged exposure to LPS for 48h or 5 days (5d). Rhesus chorioamnion-decidua section from paraffin-embedded blocks were stained with Vimentin (cyan), CD14 (red), CD45 (green), and DAPI (blue). Orange arrows in the magnified yellow insets (#1) indicate Vimentin( $Vim$ ) $^+CD14^+CD45^-$  cells, while red arrows in red insets (#2) indicate  $Vim^+CD14^-CD45^-$  cells. Dotted white lines denote the different layers. Dotted white lines denote the different layers (amnion and chorion). Of note,  $Vim^+CD14^+CD45^-$  were not present in the chorion layer. Representative sections ( $n=3$ /group) are shown. (B) Uterus of IA saline ctrl or LPS 16h animals was finely minced, digested, and cell suspension was analyzed by flow cytometry. Representative contour plots ( $n=2$ /treatment).



# Figure S12.

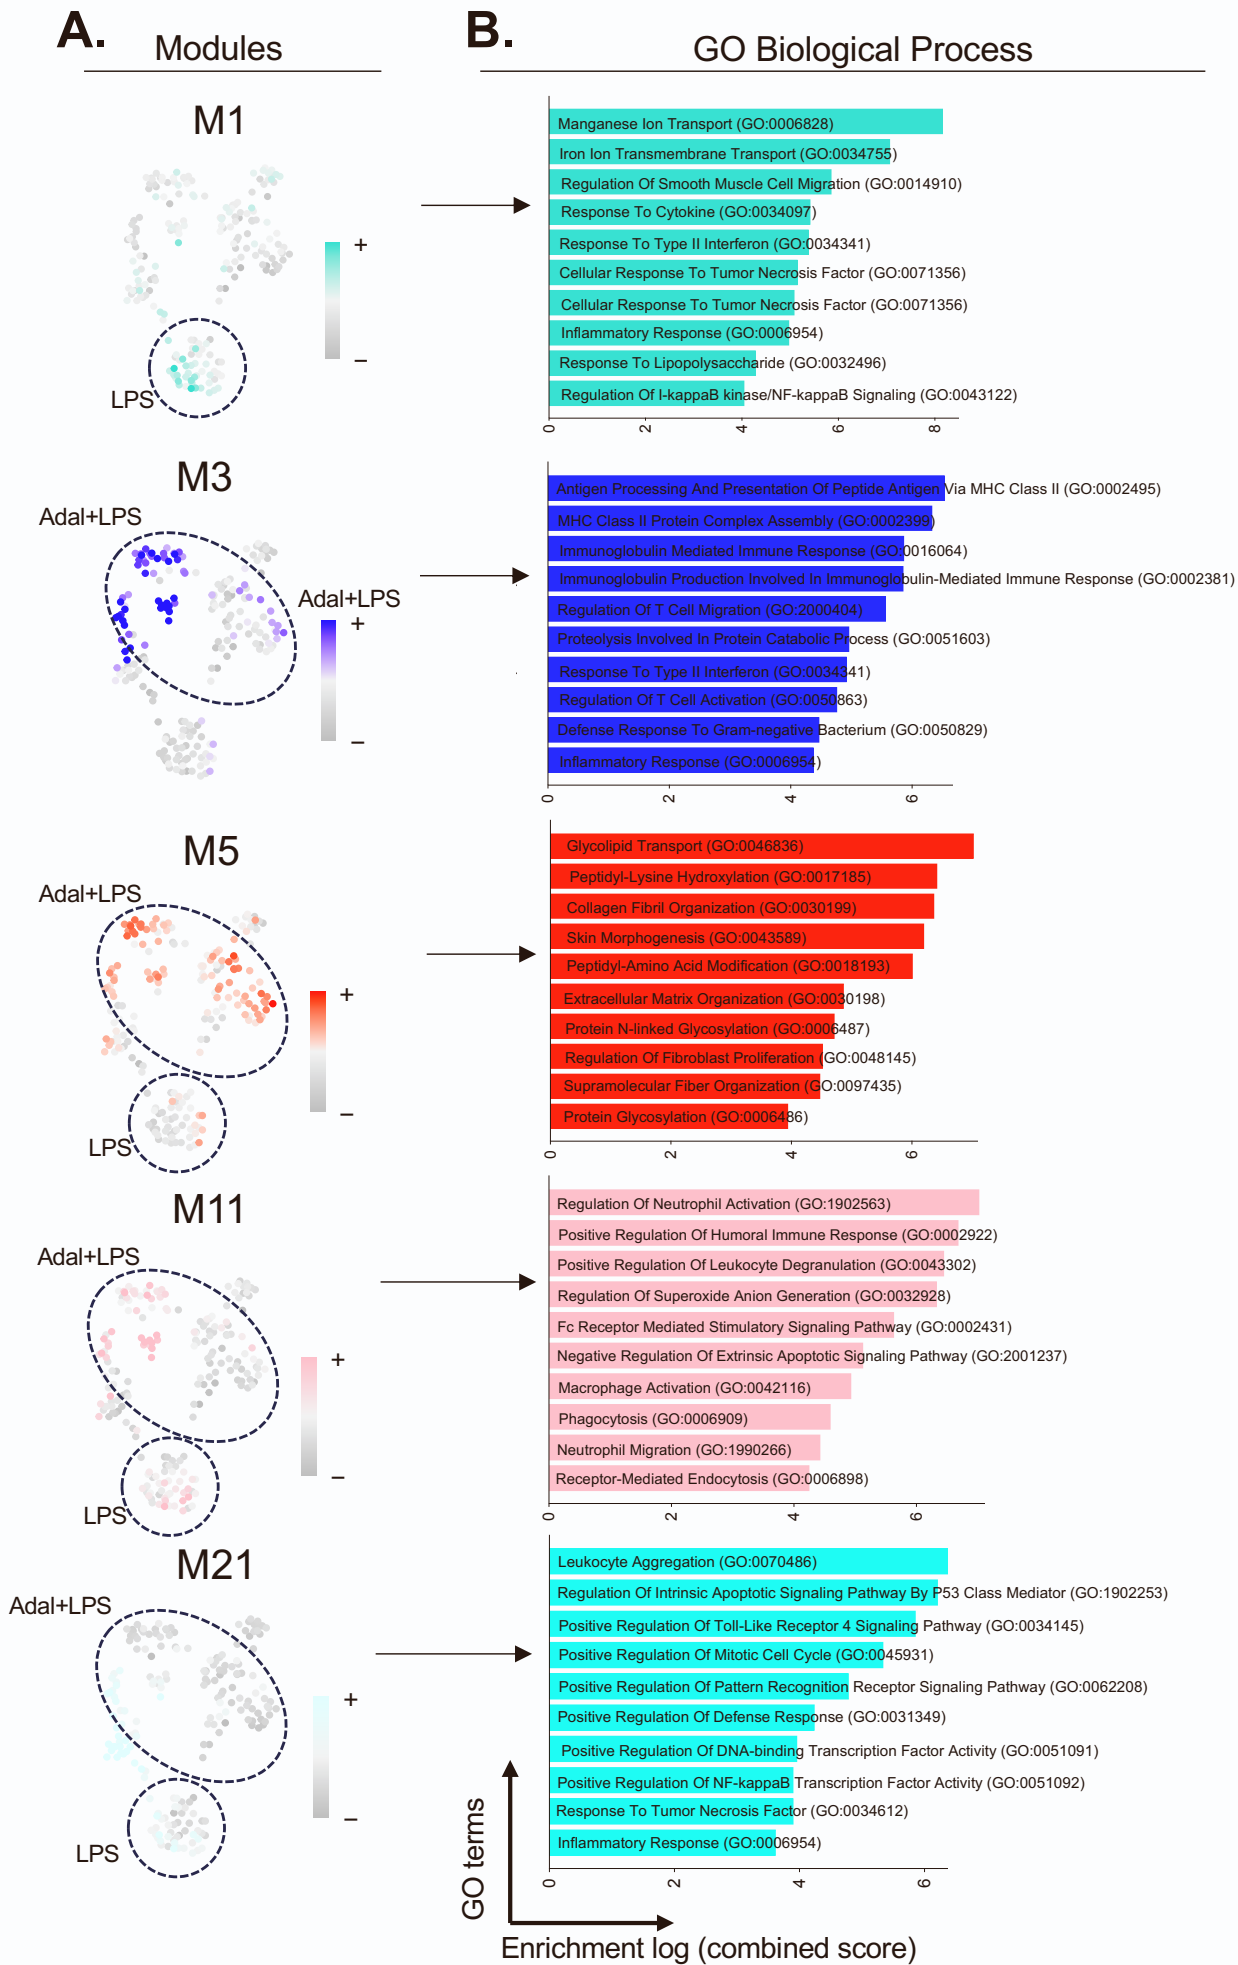

**Figure S12. [Co-expression network analysis of amnion mesenchymal cluster cells], Related to Figure 4.** (A) scRNA-seq UMAP plots as in Figure 4C colored by module eigengenes (ME) for selected modules. Dotted line denotes clustering by prenatal treatments as in Figure 4C. (B) GO Biological Process enrichment analysis of the 100 most connected eigengenes for each module, as determined the eigengene-based connectivity (kME). Enriched terms are sorted by the combined Enrichr score. Only those modules with p-adjusted value<0.05 were retained.

# Figure S13.

A.

bulk RNA-seq - Amnion

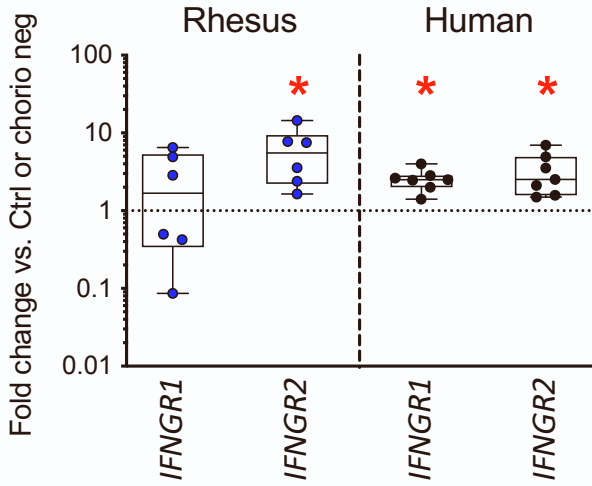

..... Rhesus Ctrl or Human Chorio neg (mean of 8)

● LPS (n=6)

● Chorio pos (n=7)

B.

scRNA-seq - AMCs

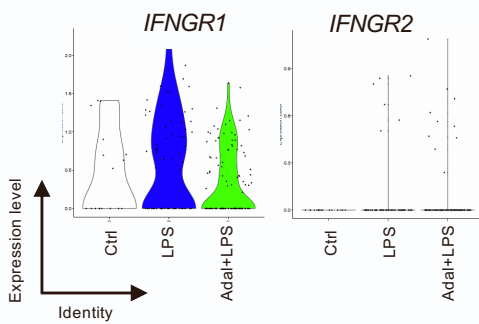

C.

Rhesus – Amniotic fluid

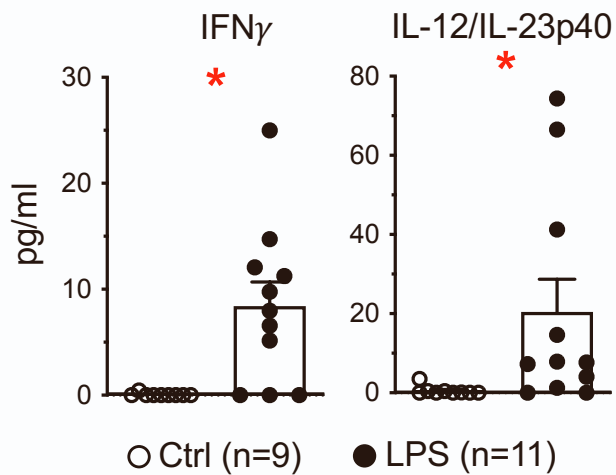

○ Ctrl (n=9)

● LPS (n=11)

**Figure S13. [Upregulation of IFN $\gamma$ /IL12/IL23 axis upon exposure to LPS], Related to Figure 7.** (A) Bulk RNA-seq analysis shows that inflammation induces a significant upregulation of *IFNGR1* (Interferon gamma receptor 1) in Rhesus and *IFNGR1* and *IFNGR2* (Interferon gamma receptor 2) transcripts in human amnion. (B) Similar results are observed with scRNA-seq of AMCs. (C) IFN $\gamma$  and IL-12/IL-23p40 concentrations were measured in Rhesus amniotic fluid at delivery by Luminex using non-human primate multiplex kits (Millipore). Inflammation caused by LPS-exposure significantly increased the levels of these two cytokines that are characteristic of activated antigen presenting cells. Data are represented as mean $\pm$ SE. P \* <0.05 vs. ctrl in Rhesus or chorio neg in human (Mann-Whitney U test).
