# Supplementary material for: Amnion responses to intrauterine inflammation and effects of inhibition of TNF signaling in preterm Rhesus macaque
Source: PubMed Central journal article supplement — iScience. 2023 Oct 6;26(11):108118. doi: 10.1016/j.isci.2023.108118 (PMC10637919; doi:10.1016/j.isci.2023.108118), 2023-10-06
Supplement: mmc2.pdf [file mmc2.pdf]

**Table S1. [Clinical characteristics of animals used in the study], Related to Figures 1 and 2.**

|                                                            | <b>Ctrl (Saline)<br/>n=12 (IA n=11;<br/>IM n=1)</b> | <b>IA LPS 16h<br/>n=15</b> | <b>IA/SC<br/>Adalimuma<br/>b + IA LPS<br/>16h n=6</b> | <b>IA LPS<br/>48h n=3<sup>#</sup></b> | <b>IA LPS<br/>5d n=3<sup>#</sup></b> |
|------------------------------------------------------------|-----------------------------------------------------|----------------------------|-------------------------------------------------------|---------------------------------------|--------------------------------------|
| <b>maternal age, year ± SD</b>                             | 10 ± 3                                              | 8 ± 3                      | 10.3 ± 2                                              | 9.5 ± 2.5                             | 8.7 ± 2.3                            |
| <b>maternal weight (Kg)</b>                                | 8.9 ± 1.5                                           | 9.6 ± 1.9                  | 10.6 ± 1                                              | 8.2 ± 1.4                             | 7 ± 1                                |
| <b>Median gestational age at<br/>delivery, day [range]</b> | 131 [128-136]                                       | 131 [129-136]              | 131 [127-<br>134]                                     | 127 [126-<br>137]                     | 133<br>[131-<br>133]                 |
| <b>mean birth weight, gram ± SD</b>                        | 339.4 ± 44.1                                        | 315.7 ± 47.2               | 338.3 ± 81.6                                          | 283.6 ±<br>26.5                       | 318 ±<br>21.6                        |
| <b>Fetal gender (F/M)</b>                                  | 7/5                                                 | 10/5                       | 3/3                                                   | 3/0                                   | 1/2                                  |
| <b>n for bulk RNA-seq</b>                                  | 3                                                   | 6                          | 6                                                     | n/a                                   | n/a                                  |
| <b>n for scRNA-seq</b>                                     | 2*                                                  | 3                          | 3                                                     | n/a                                   | n/a                                  |
| <b>shared with bulk RNA-seq</b>                            | 1/3                                                 | 2/6                        | 3/3                                                   | n/a                                   | n/a                                  |
| <b>shared with qPCR</b>                                    | 2/8                                                 | 2/8                        | 3/5                                                   | n/a                                   | n/a                                  |
| <b>shared ELISA</b>                                        | 0/2                                                 | 1/3                        | 2/3                                                   | n/a                                   | n/a                                  |
| <b>shared with flow cytometry</b>                          | 0                                                   | 0                          | n/a                                                   | n/a                                   | n/a                                  |
| <b>shared with<br/>immunohistology</b>                     | 1/2                                                 | 2/4                        | n/a                                                   | n/a                                   | n/a                                  |
| <b>n for qPCR</b>                                          | 8                                                   | 8                          | 5                                                     | n/a                                   | n/a                                  |
| <b>shared with bulk RNA-seq</b>                            | 2/8                                                 | 2/8                        | 5/5                                                   | n/a                                   | n/a                                  |
| <b>shared with ELISA</b>                                   | 7/9                                                 | 7/11                       | n/a                                                   | n/a                                   | n/a                                  |
| <b>shared with flow cytometry</b>                          | 0                                                   | 0                          | n/a                                                   | n/a                                   | n/a                                  |
| <b>n for ELISA</b>                                         | 9                                                   | 11                         | n/a                                                   | n/a                                   | n/a                                  |
| <b>shared with flow cytometry</b>                          | 0                                                   | 0                          | n/a                                                   | n/a                                   | n/a                                  |
| <b>n for flow cytometry</b>                                | 2                                                   | 2                          | n/a                                                   | n/a                                   | n/a                                  |
| <b>n for immunohistology</b>                               | 4                                                   | 4                          | n/a                                                   | 3                                     | 3                                    |

IA=intraamniotic; IM=intramuscular; SC=subcutaneous

\*Analysis of scRNA-seq data did not show any amnion signature in one control and therefore such animal was excluded.

<sup>#</sup>IA LPS 4h and 5 days animals were only used for immunohistology

Note: It was not always possible to obtain all the tissues/fluids from each animal. The numbers of animals for each experiment are also shown in the corresponding figure.

**Table S2. [Clinical characteristics of pregnant women who delivered preterm newborns and number of samples used/experiment], Related to Figure1.**

|                                                    | <b>Preterm chorio negative (n=8)</b> | <b>Preterm chorio positive (n=7)</b> | <b>P value</b>     |
|----------------------------------------------------|--------------------------------------|--------------------------------------|--------------------|
| <b>Maternal age, year <math>\pm</math> SD</b>      | 30.5 $\pm$ 6.27                      | 30.5 $\pm$ 6.77                      | >0.99 <sup>#</sup> |
| <b>Median GA at delivery, weeks [range]</b>        | 32 [27-35]                           | 31 [29-34]                           | 0.61 <sup>#</sup>  |
| <b>Causes of preterm birth</b>                     |                                      |                                      |                    |
| • <b>PTL or preterm-PROM</b>                       | 3/6*                                 | 7/7                                  | 0.004 <sup>‡</sup> |
| • <b>Other indications</b>                         | 3/6*                                 | 2/7                                  | 0.9 <sup>‡</sup>   |
| <b>Antenatal steroid use</b>                       | 6/6*                                 | 7/7                                  | 0.9 <sup>‡</sup>   |
| <b>Antenatal antibiotics use</b>                   | 1/6*                                 | 5/7                                  | 0.3 <sup>‡</sup>   |
| <b>Cesarean delivery</b>                           | 6/8                                  | 3/7                                  | 0.15 <sup>‡</sup>  |
| <b>The presence of labor</b>                       | 3/6*                                 | 6/7                                  | 0.26 <sup>‡</sup>  |
| <b>Spontaneous labor</b>                           | 3/6*                                 | 5/6*                                 | 0.54 <sup>‡</sup>  |
| <b>Neonatal male gender M/F</b>                    | 3/4*                                 | 4/3                                  | >0.99 <sup>‡</sup> |
| <b>Mean birth weight, gram <math>\pm</math> SD</b> | 1485 $\pm$ 650*                      | 1808 $\pm$ 341                       | 0.31 <sup>#</sup>  |
| <b>White Caucasian race</b>                        | 5                                    | 3                                    | 0.61 <sup>‡</sup>  |
| <b>African American race</b>                       | 3                                    | 4                                    | 0.61 <sup>‡</sup>  |
| <b>n for bulk RNA-seq</b>                          | 8                                    | 7                                    |                    |
| <b>n for qPCR</b>                                  | 8                                    | 6-7                                  |                    |

PTL=preterm labor; PROM=premature rupture of membranes

Other indications: PIH=pregnancy induced hypertension; HTN=hypertension

<sup>‡</sup>Fisher's exact test

<sup>#</sup>Student t test in yellow

\*Some values are missing

**Table S3. [List of Rhesus and Human Taqman probes].**

|                | <b>Rhesus</b> | <b>Human</b> |
|----------------|---------------|--------------|
| <i>SI00A9</i>  | Rh02801277    | m1           |
| <i>CCL5</i>    | Rh02621811    | m1           |
| <i>ADORA2A</i> | Rh02902837    | m1           |
| <i>ICAM1</i>   | Rh02621706    | m1           |
| <i>NOD2</i>    | Rh02879855    | m1           |
| <i>TNFAIP3</i> | Rh02860236    | m1           |
| <i>CXCL3</i>   | Rh02788128    | gH           |
| <i>TNF</i>     | Hs99999043    | m1           |
| <i>NFKB2</i>   | Rh02621752    | m1           |
| <i>RELA</i>    | Rh02802962    |              |

**Table S4. [List of the 104 genes upregulated and in common between amnion of LPS-exposed animals and human of preterm positive samples], Related to Figure 1.**

|          |           |           |
|----------|-----------|-----------|
| CLEC4E   | TNFRSF10C | NFKBIA    |
| IL1A     | STEAP4    | CD44      |
| CCL5     | SPATC1    | KCNK5     |
| IL1B     | MFSD2A    | IFNGR2    |
| NKX3-1   | TRAF1     | NFKBIE    |
| CSF3R    | SAMSN1    | PSME2     |
| S100A9   | DGAT2     | MYO10     |
| APOBEC3A | MUC22     | TIPARP    |
| CCL20    | PTGIR     | CFLAR     |
| CXCR1    | MEDAG     | MXD1      |
| ANGPTL4  | ADAMTS4   | FAS       |
| CLEC4D   | PNP       | NFKB1     |
| MMP3     | IER3      | DRAM1     |
| LTF      | OLR1      | ARHGEF3   |
| TNIP3    | GCH1      | TNIP1     |
| EBI3     | TNFAIP2   | APOL6     |
| PLEK     | SLC41A2   | PANX1     |
| TNF      | FOSL1     | SLC43A3   |
| CXCL3    | HAMP      | OSMR      |
| IL18RAP  | TNFAIP3   | PLK3      |
| SELL     | HILPDA    | SLC43A2   |
| CSF3     | CCL3      | NFKB2     |
| SLAMF7   | ICAM1     | ZDHHC9    |
| S100A8   | RNF207    | SERPINB8  |
| ADORA2A  | RIPK2     | TRAF3IP2  |
| MMP10    | IRF1      | SLC25A37  |
| FDCSP    | PTGS2     | SOCS3     |
| OSM      | CHI3L2    | STAT5A    |
| SLAMF1   | IL2RG     | REL       |
| ANKRD33B | SLC7A2    | NOD2      |
| RHOH     | ACSL4     | TNFAIP8L3 |
| SGPP2    | CSF1      | BCL6      |
| G0S2     | IFIH1     | ETS2      |
| GK       | CSTA      | ETHE1     |
| CXCL1    | BATF      |           |

**Table S5. [Rhesus top 30 GO terms based on 257 LPS-induced genes], Related to Figure 1.**

| Term                                                                                            | # of genes | Fold enrichment | adj p-value |
|-------------------------------------------------------------------------------------------------|------------|-----------------|-------------|
| cytokine-mediated signaling pathway (GO:0019221)                                                | 51         | 25.56           | 1.42E-22    |
| inflammatory response (GO:0006954)                                                              | 30         | 19.72           | 4.84E-17    |
| cellular response to cytokine stimulus (GO:0071345)                                             | 34         | 15.91           | 2.11E-13    |
| positive regulation of cytokine production (GO:0001819)                                         | 19         | 10.14           | 9.14E-08    |
| positive regulation of response to external stimulus (GO:0032103)                               | 13         | 9.88            | 1.34E-07    |
| positive regulation of intracellular signal transduction (GO:1902533)                           | 27         | 9.87            | 1.16E-07    |
| regulation of I-kappaB kinase/NF-kappaB signaling (GO:0043122)                                  | 18         | 9.79            | 1.18E-07    |
| regulation of inflammatory response (GO:0050727)                                                | 16         | 9.33            | 2.99E-07    |
| cellular response to interleukin-1 (GO:0071347)                                                 | 15         | 9.00            | 5.62E-07    |
| negative regulation of cytokine production (GO:0001818)                                         | 13         | 8.77            | 8.60E-07    |
| positive regulation of inflammatory response (GO:0050729)                                       | 11         | 8.65            | 1.04E-06    |
| neutrophil degranulation (GO:0043312)                                                           | 25         | 8.48            | 1.40E-06    |
| neutrophil activation involved in immune response (GO:0002283)                                  | 25         | 8.41            | 1.53E-06    |
| negative regulation of type I interferon production (GO:0032480)                                | 9          | 8.40            | 1.45E-06    |
| neutrophil mediated immunity (GO:0002446)                                                       | 25         | 8.34            | 1.56E-06    |
| positive regulation of NF-kB transcription factor activity (GO:0051092)                         | 13         | 7.96            | 3.50E-06    |
| regulation of type I interferon production (GO:0032479)                                         | 11         | 7.93            | 3.53E-06    |
| negative regulation of viral genome replication (GO:0045071)                                    | 9          | 7.88            | 3.72E-06    |
| response to interferon-gamma (GO:0034341)                                                       | 10         | 7.81            | 4.18E-06    |
| cellular response to lipopolysaccharide (GO:0071222)                                            | 11         | 7.61            | 6.21E-06    |
| response to cytokine (GO:0034097)                                                               | 13         | 7.56            | 6.63E-06    |
| cellular response to interferon-gamma (GO:0071346)                                              | 12         | 7.48            | 7.67E-06    |
| positive regulation of defense response (GO:0031349)                                            | 10         | 7.44            | 7.98E-06    |
| regulation of defense response (GO:0031347)                                                     | 10         | 7.39            | 8.72E-06    |
| regulation of interleukin-6 production (GO:0032675)                                             | 8          | 7.27            | 1.10E-05    |
| negative regulation of viral life cycle (GO:1903901)                                            | 9          | 7.09            | 1.58E-05    |
| positive regulation of type I interferon production (GO:0032481)                                | 9          | 7.03            | 1.76E-05    |
| regulation of viral genome replication (GO:0045069)                                             | 9          | 6.97            | 1.96E-05    |
| response to lipopolysaccharide (GO:0032496)                                                     | 13         | 6.96            | 1.91E-05    |
| positive regulation of sequence-specific DNA binding transcription factor activity (GO:0051091) | 15         | 6.88            | 2.22E-05    |

Shaded rows represent 50% GO terms shared between Rhesus and human

**Tbale S6. [Human top 30 GO terms based on 1619 chorioamnionitis-induced genes], Related to Figure 1.**

| Term                                                                    | # of genes | Fold enrichment | adj p-value |
|-------------------------------------------------------------------------|------------|-----------------|-------------|
| cytokine-mediated signaling pathway (GO:0019221)                        | 121        | 18.77           | 8.60E-16    |
| inflammatory response (GO:0006954)                                      | 66         | 17.43           | 9.55E-15    |
| cellular response to cytokine stimulus (GO:0071345)                     | 90         | 14.93           | 1.98E-12    |
| response to lipopolysaccharide (GO:0032496)                             | 44         | 13.17           | 8.54E-11    |
| response to molecule of bacterial origin (GO:0002237)                   | 32         | 11.57           | 2.77E-09    |
| response to lipid (GO:0033993)                                          | 36         | 9.57            | 2.31E-07    |
| regulation of I-kappaB kinase/NF-kappaB signaling (GO:0043122)          | 43         | 8.36            | 3.21E-06    |
| positive regulation of inflammatory response (GO:0050729)               | 23         | 8.16            | 4.37E-06    |
| neutrophil mediated immunity (GO:0002446)                               | 76         | 7.73            | 1.07E-05    |
| positive regulation of intracellular signal transduction (GO:1902533)   | 75         | 7.69            | 1.03E-05    |
| cellular response to tumor necrosis factor (GO:0071356)                 | 40         | 7.54            | 1.34E-05    |
| regulation of cell proliferation (GO:0042127)                           | 103        | 7.52            | 1.30E-05    |
| cellular response to lipopolysaccharide (GO:0071222)                    | 25         | 7.47            | 1.34E-05    |
| regulation of leukocyte chemotaxis (GO:0002688)                         | 13         | 6.72            | 6.99E-05    |
| neutrophil degranulation (GO:0043312)                                   | 72         | 6.69            | 6.88E-05    |
| positive regulation of defense response (GO:0031349)                    | 21         | 6.64            | 7.34E-05    |
| positive regulation of I-kappaB kinase/NF-kappaB signaling (GO:0043123) | 34         | 6.64            | 6.95E-05    |
| neutrophil activation involved in immune response (GO:0002283)          | 72         | 6.55            | 7.95E-05    |
| I-kappaB kinase/NF-kappaB signaling (GO:0007249)                        | 18         | 6.55            | 7.64E-05    |
| positive regulation of acute inflammatory response (GO:0002675)         | 9          | 6.34            | 1.17E-04    |
| cellular response to molecule of bacterial origin (GO:0071219)          | 22         | 6.26            | 1.35E-04    |
| positive regulation of leukocyte chemotaxis (GO:0002690)                | 18         | 6.06            | 2.04E-04    |
| cellular response to interleukin-1 (GO:0071347)                         | 31         | 6.02            | 2.13E-04    |
| positive regulation of leukocyte migration (GO:0002687)                 | 13         | 5.96            | 2.32E-04    |
| negative regulation of apoptotic process (GO:0043066)                   | 70         | 5.86            | 2.80E-04    |
| response to cytokine (GO:0034097)                                       | 29         | 5.83            | 2.92E-04    |
| MyD88-independent toll-like receptor signaling pathway (GO:0002756)     | 12         | 5.79            | 3.05E-04    |
| regulation of intrinsic apoptotic signaling pathway (GO:2001242)        | 15         | 5.62            | 4.35E-04    |
| cellular zinc ion homeostasis (GO:0006882)                              | 12         | 5.61            | 4.29E-04    |
| regulation of inflammatory response (GO:0050727)                        | 32         | 5.50            | 5.39E-04    |

Shaded rows represent 50% GO terms shared between Rhesus and human

**Table S7. [Rhesus top 30 Wiki pathways based on 257 LPS-induced genes], Related to Figure 1.**

| Term                                                                      | # of genes | Fold enrichment | adj p-value |
|---------------------------------------------------------------------------|------------|-----------------|-------------|
| Photodynamic therapy-induced NF-kB survival signaling WP3617              | 11         | 12.39           | 1.91E-10    |
| Type II interferon signaling (IFNG) WP619                                 | 10         | 10.58           | 6.24E-09    |
| miRNAs involvement in the immune response in sepsis WP4329                | 9          | 9.12            | 1.19E-07    |
| EBV LMP1 signaling WP262                                                  | 7          | 7.96            | 1.29E-06    |
| The human immune response to tuberculosis WP4197                          | 7          | 7.96            | 1.04E-06    |
| TNF alpha Signaling Pathway WP231                                         | 10         | 6.53            | 2.32E-05    |
| Non-genomic actions of 1,25 dihydroxyvitamin D3 WP4341                    | 9          | 6.51            | 2.08E-05    |
| Vitamin D Receptor Pathway WP2877                                         | 13         | 6.16            | 4.12E-05    |
| Cytokines and Inflammatory Response WP530                                 | 6          | 6.10            | 4.13E-05    |
| Toll-like Receptor Signaling Pathway WP75                                 | 10         | 6.07            | 4.02E-05    |
| Selenium Micronutrient Network WP15                                       | 9          | 5.79            | 6.92E-05    |
| Regulation of toll-like receptor signaling pathway WP1449                 | 11         | 5.73            | 7.35E-05    |
| Thymic Stromal LymphoPoietin (TSLP) Signaling Pathway WP2203              | 7          | 5.67            | 7.85E-05    |
| T-Cell antigen Receptor (TCR) Signaling Pathway WP69                      | 9          | 5.63            | 7.99E-05    |
| Vitamin B12 Metabolism WP1533                                             | 7          | 5.48            | 1.05E-04    |
| Apoptosis-related network due to altered Notch3 in ovarian cancer WP2864  | 7          | 5.30            | 1.46E-04    |
| RIG-I-like Receptor Signaling WP3865                                      | 7          | 4.94            | 3.20E-04    |
| IL1 and megakaryocytes in obesity WP2865                                  | 5          | 4.93            | 3.08E-04    |
| Apoptosis WP254                                                           | 8          | 4.90            | 3.11E-04    |
| Nucleotide-binding Oligomerization Domain (NOD) pathway WP1433            | 6          | 4.88            | 3.09E-04    |
| IL-7 Signaling Pathway WP205                                              | 5          | 4.84            | 3.26E-04    |
| TNF related weak inducer of apoptosis (TWEAK) Signaling Pathway WP2036    | 6          | 4.82            | 3.24E-04    |
| Oncostatin M Signaling Pathway WP2374                                     | 7          | 4.71            | 4.04E-04    |
| Folate Metabolism WP176                                                   | 7          | 4.66            | 4.28E-04    |
| Prolactin Signaling Pathway WP2037                                        | 7          | 4.26            | 0.001034078 |
| Platelet-mediated interactions with vascular and circulating cells WP4462 | 4          | 4.26            | 0.001008738 |
| Signal transduction through IL1R WP4496                                   | 5          | 4.22            | 0.001041671 |
| IL-4 Signaling Pathway WP395                                              | 6          | 4.18            | 0.001102918 |
| Nuclear Receptors Meta-Pathway WP2882                                     | 14         | 4.15            | 0.001147749 |
| Hematopoietic Stem Cell Differentiation WP2849                            | 6          | 4.14            | 0.001143122 |

Shaded rows represent 50% Wiki pathways shared between Rhesus and human

**Table S8. [Human top 30 Wiki pathways based on 1619 chorioamnionitis induced genes], Related to Figure 1.**

| Term                                                                   | # of genes | Fold enrichment | adj p-value |
|------------------------------------------------------------------------|------------|-----------------|-------------|
| Photodynamic therapy-induced NF-kB survival signaling WP3617           | 20         | 12.91           | 5.84E-11    |
| Apoptosis WP254                                                        | 29         | 11.23           | 1.39E-09    |
| miRNAs involvement in the immune response in sepsis WP4329             | 16         | 8.12            | 1.20E-06    |
| TNF related weak inducer of apoptosis (TWEAK) Signaling Pathway WP2036 | 17         | 8.06            | 1.04E-06    |
| Regulation of toll-like receptor signaling pathway WP1449              | 33         | 7.89            | 1.22E-06    |
| Oncostatin M Signaling Pathway WP2374                                  | 21         | 7.73            | 1.47E-06    |
| TNF alpha Signaling Pathway WP231                                      | 25         | 7.36            | 2.92E-06    |
| Thymic Stromal Lymphopoietin (TSLP) Signaling Pathway WP2203           | 17         | 7.19            | 3.77E-06    |
| Toll-like Receptor Signaling Pathway WP75                              | 26         | 6.92            | 6.26E-06    |
| Senescence and Autophagy in Cancer WP615                               | 26         | 6.74            | 8.52E-06    |
| Lung fibrosis WP3624                                                   | 19         | 6.52            | 1.29E-05    |
| TLR4 Signaling and Tolerance WP3851                                    | 12         | 6.18            | 2.60E-05    |
| Photodynamic therapy-induced AP-1 survival signaling. WP3611           | 16         | 5.97            | 3.85E-05    |
| Mammary gland development pathway - Involution (Stage 4 of 4) WP2815   | 7          | 5.67            | 7.19E-05    |
| Apoptosis Modulation and Signaling WP1772                              | 22         | 5.62            | 7.56E-05    |
| RIG-I-like Receptor Signaling WP3865                                   | 17         | 5.48            | 9.69E-05    |
| IL-4 Signaling Pathway WP395                                           | 16         | 5.48            | 9.26E-05    |
| EBV LMP1 signaling WP262                                               | 10         | 5.31            | 1.29E-04    |
| Signal transduction through IL1R WP4496                                | 12         | 5.28            | 1.31E-04    |
| Adipogenesis WP236                                                     | 26         | 4.88            | 3.08E-04    |
| Folate Metabolism WP176                                                | 17         | 4.87            | 3.01E-04    |
| TGF-beta Receptor Signaling WP560                                      | 15         | 4.80            | 3.44E-04    |
| Toll-like Receptor Signaling WP3858                                    | 11         | 4.77            | 3.51E-04    |
| Role Altered Glycolysation of MUC1 in Tumour Microenvironment WP4480   | 6          | 4.73            | 3.67E-04    |
| IL-1 signaling pathway WP195                                           | 15         | 4.69            | 3.85E-04    |
| RAC1/PAK1/p38/MMP2 Pathway WP3303                                      | 17         | 4.69            | 3.72E-04    |
| Hepatitis C and Hepatocellular Carcinoma WP3646                        | 14         | 4.67            | 3.76E-04    |
| Structural Pathway of Interleukin 1 (IL-1) WP2637                      | 14         | 4.67            | 3.63E-04    |
| IL-9 Signaling Pathway WP22                                            | 8          | 4.65            | 3.62E-04    |
| Vitamin D Receptor Pathway WP2877                                      | 32         | 4.64            | 3.60E-04    |

Shaded rows represent 50% Wiki pathways shared between Rhesus and human



**Table S9. [Rhesus top 30 KEGG pathways based on 257 LPS-induced genes], Related to Figure 1.**

| <b>Term</b>                               | <b># of genes</b> | <b>Fold enrichment</b> | <b>adj p-value</b> |
|-------------------------------------------|-------------------|------------------------|--------------------|
| TNF signaling pathway                     | 19                | 15.69                  | 6.31E-14           |
| Cytokine-cytokine receptor interaction    | 26                | 13.96                  | 1.68E-12           |
| IL-17 signaling pathway                   | 15                | 12.04                  | 9.38E-11           |
| NOD-like receptor signaling pathway       | 19                | 11.77                  | 1.31E-10           |
| Measles                                   | 17                | 11.60                  | 1.55E-10           |
| Osteoclast differentiation                | 15                | 10.03                  | 4.75E-09           |
| Leishmaniasis                             | 12                | 9.77                   | 7.47E-09           |
| NF-kappa B signaling pathway              | 13                | 9.58                   | 1.01E-08           |
| Influenza A                               | 16                | 9.14                   | 2.49E-08           |
| C-type lectin receptor signaling pathway  | 13                | 9.08                   | 2.57E-08           |
| Rheumatoid arthritis                      | 12                | 8.70                   | 5.64E-08           |
| Chagas disease (American trypanosomiasis) | 12                | 8.07                   | 2.19E-07           |
| Inflammatory bowel disease (IBD)          | 10                | 8.00                   | 2.35E-07           |
| JAK-STAT signaling pathway                | 14                | 7.62                   | 5.26E-07           |
| Epstein-Barr virus infection              | 15                | 7.27                   | 1.11E-06           |
| Tuberculosis                              | 14                | 7.07                   | 1.62E-06           |
| Legionellosis                             | 8                 | 6.32                   | 8.73E-06           |
| Hematopoietic cell lineage                | 10                | 6.31                   | 8.32E-06           |
| Hepatitis C                               | 12                | 6.10                   | 1.30E-05           |
| Toll-like receptor signaling pathway      | 10                | 6.03                   | 1.44E-05           |
| Salmonella infection                      | 9                 | 5.79                   | 2.37E-05           |
| Th17 cell differentiation                 | 9                 | 5.00                   | 1.39E-04           |
| Th1 and Th2 cell differentiation          | 8                 | 4.61                   | 3.28E-04           |
| Human T-cell leukemia virus 1 infection   | 12                | 4.55                   | 3.59E-04           |
| Adipocytokine signaling pathway           | 7                 | 4.54                   | 3.59E-04           |
| RIG-I-like receptor signaling pathway     | 7                 | 4.49                   | 3.80E-04           |
| Chemokine signaling pathway               | 11                | 4.44                   | 4.17E-04           |
| Malaria                                   | 6                 | 4.43                   | 4.11E-04           |
| Necroptosis                               | 10                | 4.32                   | 5.12E-04           |
| Pathways in cancer                        | 19                | 4.22                   | 6.15E-04           |

Shaded rows represent 70% KEGG pathways shared between Rhesus and human

**Table S10. [Human top 30 KEGG pathways based on 1619 chorioamnionitis-induced genes], Related to Figure 1.**

| <b>Term</b>                                     | <b># of genes</b> | <b>Fold enrichment</b> | <b>adj p-value</b> |
|-------------------------------------------------|-------------------|------------------------|--------------------|
| TNF signaling pathway                           | 45                | 20.48                  | 1.02E-18           |
| IL-17 signaling pathway                         | 37                | 16.48                  | 5.14E-15           |
| Cytokine-cytokine receptor interaction          | 60                | 10.78                  | 1.72E-09           |
| NOD-like receptor signaling pathway             | 43                | 10.33                  | 3.60E-09           |
| Influenza A                                     | 40                | 9.21                   | 3.81E-08           |
| Epstein-Barr virus infection                    | 45                | 9.08                   | 4.31E-08           |
| Hepatitis C                                     | 37                | 8.83                   | 6.51E-08           |
| C-type lectin receptor signaling pathway        | 29                | 8.72                   | 7.37E-08           |
| Kaposi sarcoma-associated herpesvirus infection | 41                | 8.60                   | 8.63E-08           |
| NF-kappa B signaling pathway                    | 25                | 7.06                   | 2.66E-06           |
| Measles                                         | 31                | 6.86                   | 3.83E-06           |
| Toll-like receptor signaling pathway            | 26                | 6.83                   | 3.77E-06           |
| JAK-STAT signaling pathway                      | 34                | 6.70                   | 4.70E-06           |
| Hepatitis B                                     | 34                | 6.64                   | 5.09E-06           |
| Human cytomegalovirus infection                 | 41                | 6.18                   | 1.36E-05           |
| Th17 cell differentiation                       | 25                | 6.00                   | 1.93E-05           |
| Cellular senescence                             | 32                | 5.86                   | 2.50E-05           |
| Chagas disease (American trypanosomiasis)       | 24                | 5.76                   | 2.96E-05           |
| Necroptosis                                     | 32                | 5.74                   | 2.97E-05           |
| Prostate cancer                                 | 23                | 5.69                   | 3.15E-05           |
| Osteoclast differentiation                      | 27                | 5.57                   | 3.93E-05           |
| Apoptosis                                       | 29                | 5.50                   | 4.44E-05           |
| Chemokine signaling pathway                     | 35                | 5.48                   | 4.42E-05           |
| Rheumatoid arthritis                            | 21                | 5.05                   | 1.14E-04           |
| MAPK signaling pathway                          | 46                | 4.92                   | 1.47E-04           |
| Small cell lung cancer                          | 21                | 4.90                   | 1.50E-04           |
| Pathways in cancer                              | 71                | 4.79                   | 1.85E-04           |
| FoxO signaling pathway                          | 27                | 4.76                   | 1.90E-04           |
| RIG-I-like receptor signaling pathway           | 17                | 4.51                   | 3.27E-04           |
| Human T-cell leukemia virus 1 infection         | 36                | 4.48                   | 3.39E-04           |

Shaded rows represent 70% KEGG pathways shared between Rhesus and human

**Table S11. [List of the 73 “TNF-dependent genes”], Related to Figure 2.**

|                    |                    |
|--------------------|--------------------|
| CLEC4E             | PNP                |
| CCL5               | ENSMMUG00000017109 |
| IL1B               | ALAS1              |
| CCL4L1             | GCH1               |
| NKX3-1             | SLCO5A1            |
| CSF3R              | CLEC4A             |
| ENSMMUG00000047942 | TNFAIP3            |
| S100A9             | ICAM1              |
| APOBEC3A           | ENSMMUG00000018474 |
| CLEC4D             | CCN4               |
| MMP3               | RNF207             |
| LTF                | AZIN2              |
| TNIP3              | MGARP              |
| PLEK               | ENSMMUG00000010981 |
| TNF                | MGAM               |
| IL18RAP            | ARPP21             |
| CAMP               | ENSMMUG00000046980 |
| NEURL3             | NFKBIA             |
| SLAMF7             | ACER1              |
| FAM163B            | DHX58              |
| MNP1A              | TNNT2              |
| BCL2A1             | NFKBIE             |
| GPR84              | MYO10              |
| ADORA2A            | MEFV               |
| OSM                | MXD1               |
| ANKRD33B           | SPAG1              |
| RHOH               | ARHGEF3            |
| ENSMMUG00000010370 | TNIP1              |
| G0S2               | NFKB2              |
| ENSMMUG00000019939 | ZDHHC9             |
| GK                 | SLC25A37           |
| MPO                | IPCEF1             |
| TNFRSF10C          | NOD2               |
| TRAF1              | RAB2B              |
| MUC22              | LIMK2              |
| MYH11              | MTMR7              |
| ADAMTS4            |                    |
